# Supplementary material
Source: MDPI journal article supplement (https://www.mdpi.com/2073-4344/10/8/932)
Supplement: s1 [file s1]

Supplementary Information for

# **Effect of Metal Composition and Carbon Support on the Durability of the Reversal Tolerant Anode with IrRu Alloy Catalyst**

**Eunyoung You <sup>1</sup>, Daejong You <sup>1</sup>, Seung Woo Lee <sup>2</sup>, Bongho Lee <sup>2</sup> and Chanho Pak <sup>2,\*</sup>**

<sup>1</sup> Fuel Cell Engineering Team, Hyundai Mobis Co. Ltd., Uiwang 16082, Republic of Korea

<sup>2</sup> Graduate Program of Energy Technology, School of Integrated Technology, Institute of Integrated Technology, Gwangju Institute of Science and Technology, Gwangju 61005, Republic of Korea

**Corresponding Author**

\* E-mail: chanho.pak@gist.ac.kr (C. Pak)

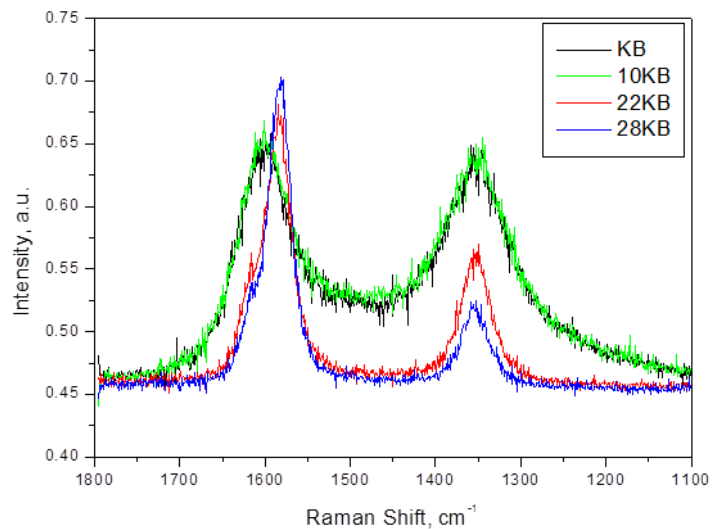

**Figure S1.** Raman spectra of KB, 10KB, 22KB, and 28KB carbon supports, normalized to the same maximum peak height.

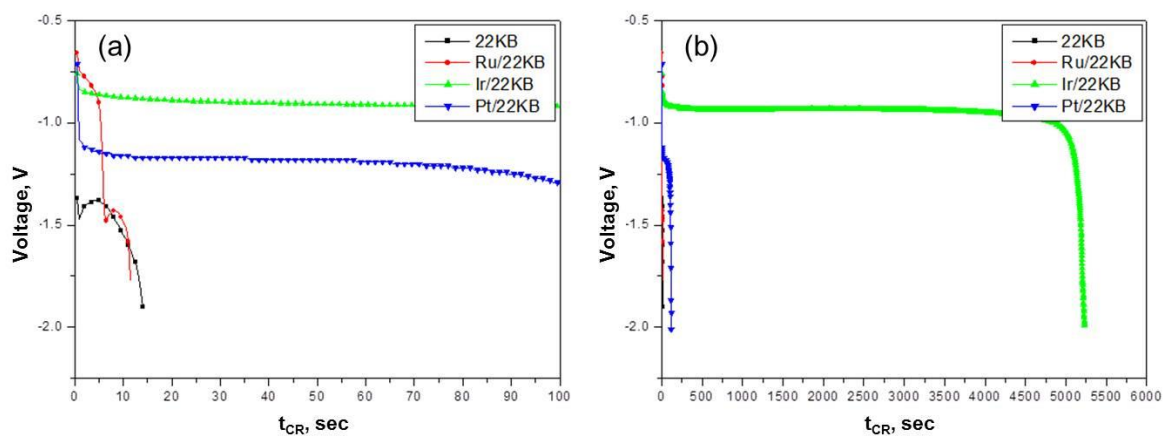

**Figure S2.** Voltage-time (V-t) plot of 22KB, Ru/22KB, Ir/22KB, and Pt/22KB anode MEAs (a) within 100 s during the cell reversal test, and (b) during the whole experimental period.

**Table S1.** N<sub>2</sub> adsorption BET surface areas and Raman spectroscopic parameters of the carbon black supports.

| Carbon Support | Description                           | N <sub>2</sub> adsorption  | Raman spectroscopy parameters |                       |          |          |
|----------------|---------------------------------------|----------------------------|-------------------------------|-----------------------|----------|----------|
|                |                                       | BET SA (m <sup>2</sup> /g) | D/G ratio (Area)              | D/G ratio (Intensity) | FWHM (D) | FWHM (G) |
| KB             | Ketjen Black 300J purchased           | 850.2                      | 1.31                          | 0.93                  | 108.1    | 76.9     |
| 10KB           | heat treated KB at 1000 °C in-house   | -                          | 1.29                          | 0.94                  | 110.7    | 84       |
| 22KB           | heat treated KB at 2200 °C, in-house  | 168                        | 0.52                          | 0.5                   | 44.2     | 42.1     |
| 28KB           | heat treated KB at 2800 °C, purchased | 131.6                      | 0.31                          | 0.26                  | 40.9     | 34.1     |
